# Supplementary material for: Association of maternal folate intake during pregnancy with infant asthma risk
Source: PubMed Central journal article supplement (PMC6554315; doi:10.1038/s41598-019-44794-z), 2019-06-06
Supplement: 41598_2019_44794_MOESM1_ESM.pdf [file 41598_2019_44794_MOESM1_ESM.pdf]

## Association of maternal folate intake during pregnancy with infant asthma risk

Weijian Li<sup>1,2†</sup>, Bo Xu<sup>3†</sup>, Yuepeng Cao<sup>2</sup>, Yang Shao<sup>4</sup>, Wanke Wu<sup>1</sup>, Jun Zhou<sup>2</sup>, Xiaofang Tan<sup>1</sup>, Xiaoli Wu<sup>1</sup>, Jing Kong<sup>1</sup>, Chen Hu<sup>1</sup>, Kaipeng Xie<sup>1\*</sup>, Jiangping Wu<sup>1\*</sup>

<sup>1</sup>The Affiliated Obstetrics and Gynecology Hospital of Nanjing Medical University, Nanjing Maternity and Child Health Care Hospital, Women's Hospital of Nanjing Medical University, Nanjing 210004, China

<sup>2</sup>Department of Urology, Drum Tower Hospital of Nanjing University Medical School, Nanjing 210008, China

<sup>3</sup>State Key Laboratory of Reproductive Medicine, Institute of Toxicology, Nanjing Medical University, 211166, China

<sup>4</sup>The First People's Hospital of Zhangjiagang city, The Zhangjiagang Affiliated Hospital of Soochow University, Suzhou 215600, China

† These authors contributed equally to this work.

\* **Corresponding author:** Jiangping Wu, The Affiliated Obstetrics and Gynecology Hospital of Nanjing Medical University, Nanjing Maternity and Child Health Care Hospital, Women's Hospital of Nanjing Medical University, Nanjing, 210004, China, Tel: +86-25-5222-6472, Fax: +86-25-5222-6472, E-mail: wujiangping@njmu.edu.cn Or Kaipeng Xie, Nanjing Maternity and Child Health Care Institute, The Affiliated Obstetrics and Gynecology Hospital of Nanjing Medical University, Nanjing Maternity and Child Health Care Hospital, Nanjing 210004, China. Tel: +86-25-5222-6264, Fax: +86-25-522-26264, E-mail: kaipengxie@njmu.edu.cn.

**Supplementary table 1. Quality of articles included in the analysis**

| Article (authors)<br>Conditions            | Year | Selection |   |   |   | Comparability |   | Outcome |   |   | NOS<br>score |
|--------------------------------------------|------|-----------|---|---|---|---------------|---|---------|---|---|--------------|
|                                            |      | 1         | 2 | 3 | 4 | a             | b | 1       | 2 | 3 |              |
| Trivedi MK <i>et al</i> [27]               | 2018 | *         | * | - | * | -             | * | *       | * | * | 7            |
| den Dekker HT <i>et al</i> [28]            | 2018 | *         | * | - | * | *             | - | *       | * | * | 7            |
| Parr CL <i>et al</i> [29]                  | 2017 | *         | * | - | * | *             | - | *       | * | * | 7            |
| Veeranki SP <i>et al</i> [30]              | 2015 | *         | * | * | - | *             | - | *       | * | * | 7            |
| Zetstra-van der Woude PA <i>et al</i> [31] | 2014 | *         | * | * | * | *             | - | *       | * | * | 8            |
| Bekkers MB <i>et al</i> [32]               | 2012 | *         | * | - | * | -             | * | -       | * | * | 6            |
| Martinussen MP <i>et al</i> [33]           | 2012 | *         | * | - | * | *             | - | -       | * | * | 6            |
| Magdelijns FJ <i>et al</i> [34]            | 2011 | *         | * | - | * | *             | - | *       | * | * | 7            |
| Whitrow MJ <i>et al</i> [35]               | 2009 | *         | * | - | * | -             | * | -       | * | * | 6            |
| Granell R <i>et al</i> [38]                | 2008 | *         | * | - | * | -             | * | -       | * | * | 6            |

Note: ‘\*’ indicates NOS quality assessment star awarded, ‘-’ indicates that no star was awarded.

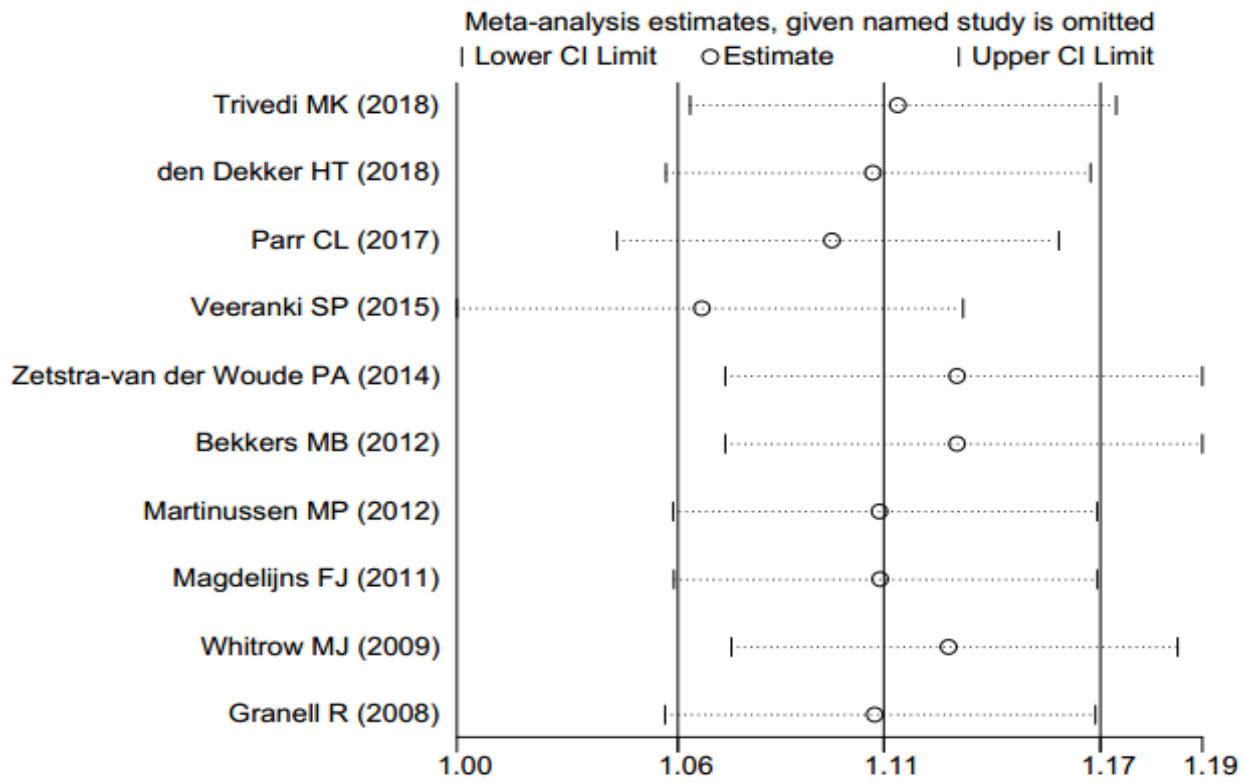

Supplementary Figure 1. Sensitivity analyses indicated that the overall RR was not markedly influenced by removing any single study except for Veeranki, S.P. *et al.*

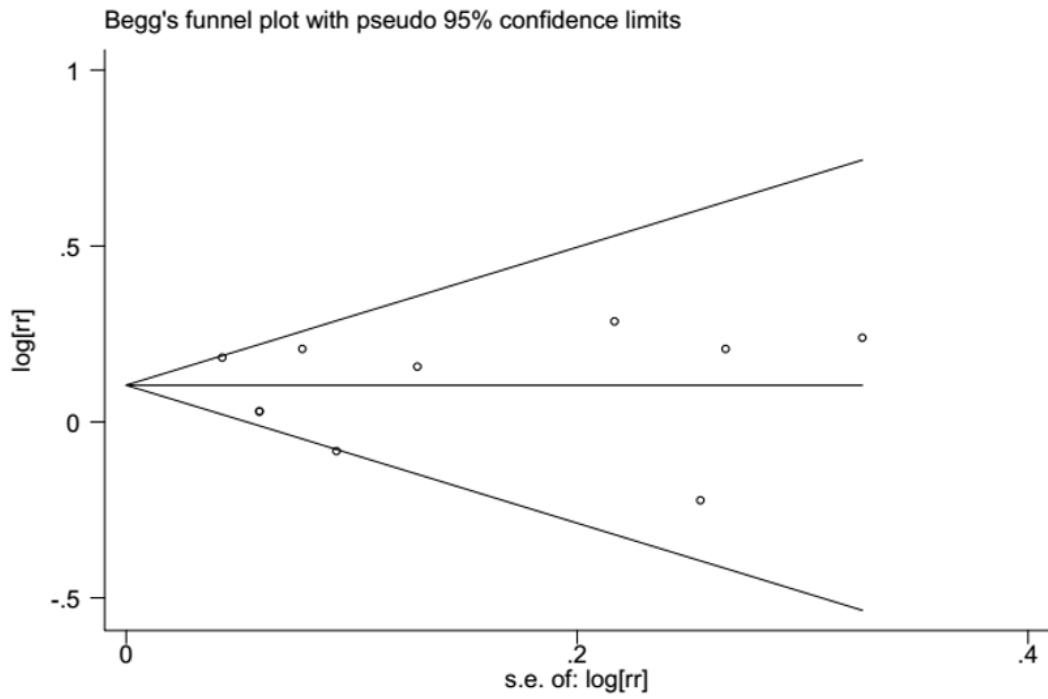

Supplementary Figure 2. Begg's Funnel plot for publication bias of maternal folate intake and infant asthma.
